# Supplementary material for: The use of a functional test battery as a non-invasive method of fatigue assessment
Source: PubMed Central journal article supplement (PMC6394954; doi:10.1371/journal.pone.0212870), 2019-02-28
Supplement: pone.0212870.s002.pdf [file pone.0212870.s002.pdf]

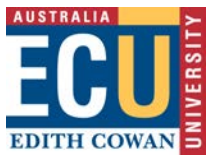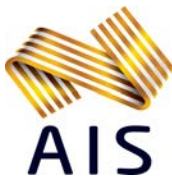**Article Name**

The use of a functional test battery as a non-invasive method of fatigue assessment

**Journal Name**

PLOS ONE

**Author Names**

Steven Hughes, Dale W Chapman, Guy G Haff, Sophia Nimphius

**Corresponding Author**

Steven Hughes

Physiology Discipline, Australian Institute of Sport

Centre for Exercise and Sports Science Research, School of Medical and Health Sciences, Edith Cowan University

**Address**

Physiology Department

Australian Institute of Sport

PO Box 176 Leverrier Street, Belconnen

Canberra, Australia Capital Territory, 2616

Australia

Tel: (61) 4 10 726 872

Email: [shug5877@uni.sydney.edu.au](mailto:shug5877@uni.sydney.edu.au)

# Neuromuscular Fatigue Questionnaire

Please circle one response for each of the following questions.

**1) Are you currently experiencing an increased level of muscular fatigue?**

|            |          |               |                   |                       |       |                   |
|------------|----------|---------------|-------------------|-----------------------|-------|-------------------|
| Not at all | Slightly | A fair amount | A moderate amount | A considerable amount | A lot | An Extreme amount |
| 0          | 1        | 2             | 3                 | 4                     | 5     | 6                 |

**2) Is your muscle fatigue causing you difficulty in performing everyday activities? For example: walking up/ down stairs, standing to sitting/ sitting to standing, putting on shoes etc.**

|            |          |               |                   |                       |       |                   |
|------------|----------|---------------|-------------------|-----------------------|-------|-------------------|
| Not at all | Slightly | A fair amount | A moderate amount | A considerable amount | A lot | An Extreme amount |
| 0          | 1        | 2             | 3                 | 4                     | 5     | 6                 |

**3) Is your muscular fatigue causing you an increased level of pain?**

|            |          |               |                   |                       |       |                   |
|------------|----------|---------------|-------------------|-----------------------|-------|-------------------|
| Not at all | Slightly | A fair amount | A moderate amount | A considerable amount | A lot | An Extreme amount |
| 0          | 1        | 2             | 3                 | 4                     | 5     | 6                 |

**4) Do you feel an increased level of tiredness/general fatigue as a result of your muscular fatigue?**

|            |          |               |                   |                       |       |                   |
|------------|----------|---------------|-------------------|-----------------------|-------|-------------------|
| Not at all | Slightly | A fair amount | A moderate amount | A considerable amount | A lot | An Extreme amount |
| 0          | 1        | 2             | 3                 | 4                     | 5     | 6                 |
